# Supplementary material for: Cold-inducible RNA binding protein (CIRP), a novel XTcf-3 specific target gene regulates neural development in Xenopus
Source: PubMed Central journal article supplement (PMC2527318; doi:10.1186/1471-213x-8-77), 2008-08-07

**A**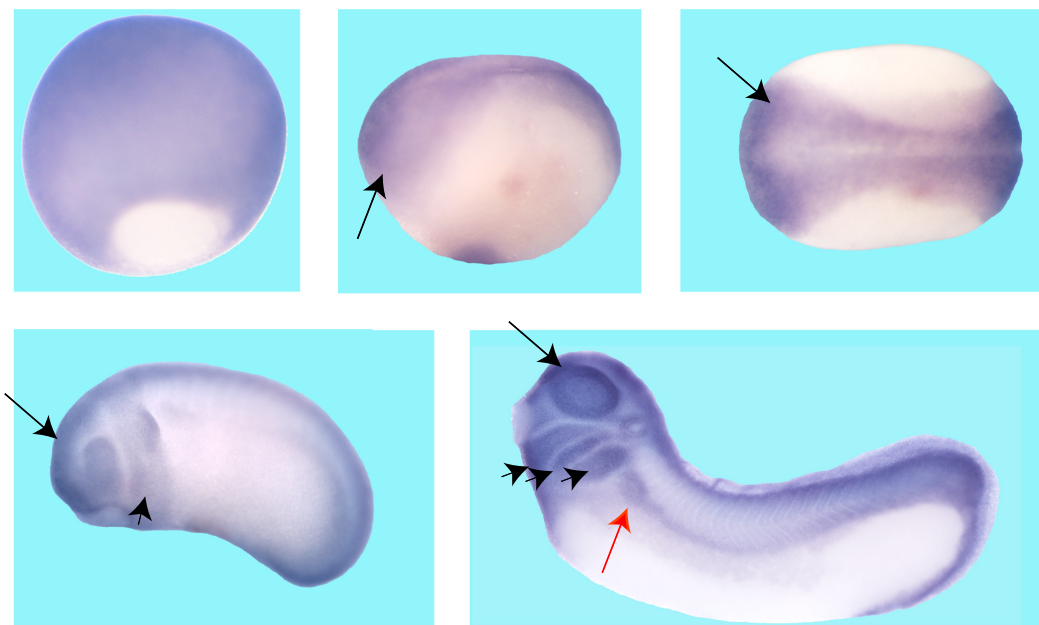**B**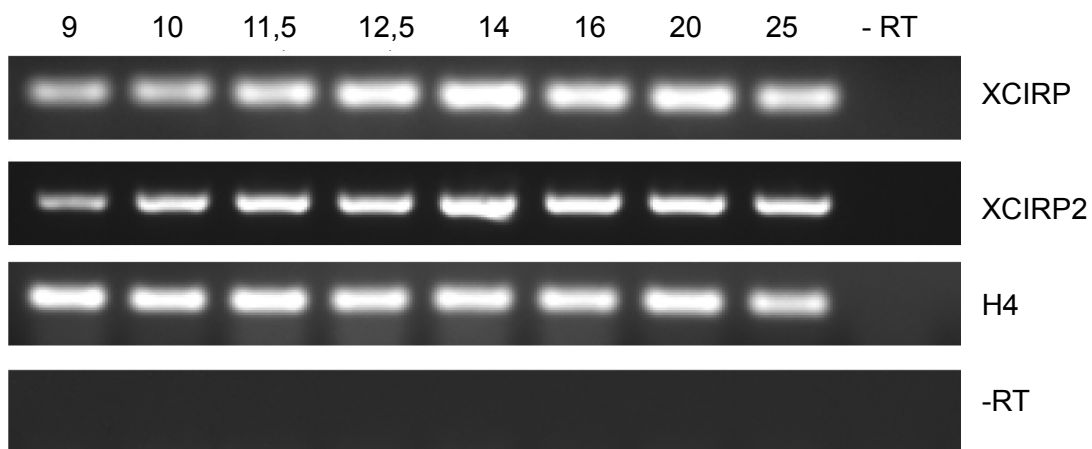

Supplement: 1471-213X-8-77-S2.pdf [file 1471-213X-8-77-S2.pdf]
